# Supplementary material for: Optimization of the heme biosynthesis pathway for the production of 5-aminolevulinic acid in Escherichia coli
Source: PubMed Central journal article supplement (PMC4341193; doi:10.1038/srep08584), 2015-02-26
Supplement: srep08584-s1.pdf [file srep08584-s1.pdf]

## Supplementary Information

### Optimization of the heme biosynthesis pathway for the production of 5-aminolevulinic acid in *Escherichia coli*

Junli Zhang<sup>1,2,3</sup>, Zhen Kang<sup>1,2,3</sup>, Jian Chen<sup>2,3</sup> & Guocheng Du<sup>2,4</sup>

<sup>1</sup>The Key Laboratory of Industrial Biotechnology, Ministry of Education, Jiangnan University, Wuxi 214122, China; <sup>2</sup>School of Biotechnology, Jiangnan University, Wuxi 214122, China; <sup>3</sup>Synergetic Innovation Center of Food Safety and Nutrition, Jiangnan University, Wuxi, Jiangsu 214122, China; <sup>4</sup>The Key Laboratory of Carbohydrate Chemistry and Biotechnology, Ministry of Education, Jiangnan University, Wuxi 214122, China; Correspondence and requests for materials should be addressed to Z.K. (email: [zkang@jiangnan.edu.cn](mailto:zkang@jiangnan.edu.cn)) or G.C.D. (email: [gcd@jiangnan.edu.cn](mailto:gcd@jiangnan.edu.cn)).

## Supplementary Figure

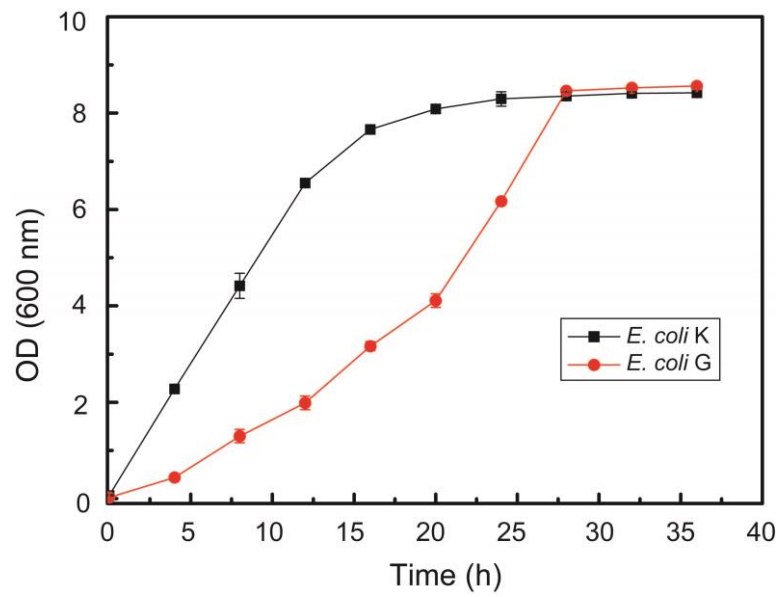

**Supplementary Figure S1.** Time course of the cell growth by recombinant strains *E. coli* K and *E. coli* G.

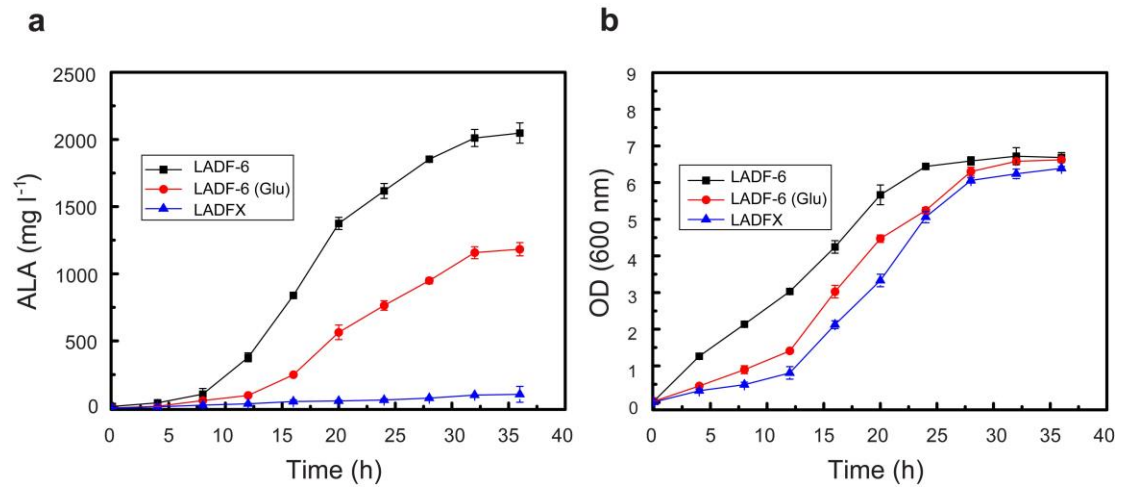

**Supplementary Figure S2.** The effect of glutamate and overexpression of *gltX* on the production of ALA and cell growth. **(a)** ALA production; **(b)** Cell growth. Black line represents recombinant *E. coli* LADF-6, red line represents recombinant *E. coli* LADF-6 with addition of glutamate and blue line represents recombinant *E. coli* LADFX with overexpression of *gltX*.

## Supplementary Tables

**Supplementary Table S1.** Strains used in this study.

| Strains                      | Relevant genotypes                                                                                                                                                       | References |
|------------------------------|--------------------------------------------------------------------------------------------------------------------------------------------------------------------------|------------|
| <i>Escherichia coli</i> DH5α | F $\phi$ 80 <i>dlacZ</i> ΔM15 Δ( <i>lacZYA-argF</i> )U169 <i>endA1 recA1 hsdR17</i> (rK <sup>-</sup> mK <sup>+</sup> ) <i>deoR thi-1 phoA supE44</i> <i>gyrA96 relA1</i> | Lab stock  |
| <i>E. coli</i> JM109         | <i>recA1 supE44 endA1 hsdR17 gyrA96 relA1 thi-1</i> Δ( <i>lac-proAB</i> )/F' [ <i>traD36proAB+lacIq E. coli lacZ</i> ΔM15]                                               | Lab stock  |
| <i>E. coli</i> BL21 (DE3)    | F' <i>ompT hsdSB</i> (rB <sup>-</sup> mB <sup>-</sup> ) <i>gal dcm</i> (DE3)                                                                                             | Lab stock  |
| <i>E. coli</i> K             | <i>E. coli</i> BL21 (DE3) harboring pCDFDuet-1                                                                                                                           | This study |
| <i>E. coli</i> B             | <i>E. coli</i> BL21 (DE3) harboring pCDFDuet-1- <i>hemB</i>                                                                                                              | This study |
| <i>E. coli</i> C             | <i>E. coli</i> BL21 (DE3) harboring pCDFDuet-1- <i>hemC</i>                                                                                                              | This study |
| <i>E. coli</i> D             | <i>E. coli</i> BL21 (DE3) harboring pCDFDuet-1- <i>hemD</i>                                                                                                              | This study |
| <i>E. coli</i> E             | <i>E. coli</i> BL21 (DE3) harboring pCDFDuet-1- <i>hemE</i>                                                                                                              | This study |
| <i>E. coli</i> F             | <i>E. coli</i> BL21 (DE3) harboring pCDFDuet-1- <i>hemF</i>                                                                                                              | This study |
| <i>E. coli</i> G             | <i>E. coli</i> BL21 (DE3) harboring pCDFDuet-1- <i>hemG</i>                                                                                                              | This study |
| <i>E. coli</i> H             | <i>E. coli</i> BL21 (DE3) harboring pCDFDuet-1- <i>hemH</i>                                                                                                              | This study |
| <i>E. coli</i> LA            | <i>E. coli</i> BL21 (DE3) harboring pACYCDuet-1- <i>hemL-hemA</i> <sup>s</sup> and pCDFDuet-1                                                                            | This study |
| <i>E. coli</i> LAB           | <i>E. coli</i> BL21 (DE3) harboring pACYCDuet-1- <i>hemL-hemA</i> <sup>s</sup> and pCDFDuet-1- <i>hemB</i>                                                               | This study |
| <i>E. coli</i> LAC           | <i>E. coli</i> BL21 (DE3) harboring pACYCDuet-1- <i>hemL-hemA</i> <sup>s</sup> and pCDFDuet-1- <i>hemC</i>                                                               | This study |
| <i>E. coli</i> LAD           | <i>E. coli</i> BL21 (DE3) harboring pACYCDuet-1- <i>hemL-hemA</i> <sup>s</sup> and pCDFDuet-1- <i>hemD</i>                                                               | This study |
| <i>E. coli</i> LAE           | <i>E. coli</i> BL21 (DE3) harboring pACYCDuet-1- <i>hemL-hemA</i> <sup>s</sup> and pCDFDuet-1- <i>hemE</i>                                                               | This study |
| <i>E. coli</i> LAF           | <i>E. coli</i> BL21 (DE3) harboring pACYCDuet-1- <i>hemL-hemA</i> <sup>s</sup> and pCDFDuet-1- <i>hemF</i>                                                               | This study |
| <i>E. coli</i> LAG           | <i>E. coli</i> BL21 (DE3) harboring pACYCDuet-1- <i>hemL-hemA</i> <sup>s</sup> and pCDFDuet-1- <i>hemG</i>                                                               | This study |
| <i>E. coli</i> LAH           | <i>E. coli</i> BL21 (DE3) harboring pACYCDuet-1- <i>hemL-hemA</i> <sup>s</sup> and pCDFDuet-1- <i>hemH</i>                                                               | This study |
| <i>E. coli</i> LADF          | <i>E. coli</i> BL21 (DE3) harboring pACYCDuet-1- <i>hemL-hemA</i> <sup>s</sup> - <i>hemF</i> and pCDFDuet-1- <i>hemD</i>                                                 | This study |
| <i>E. coli</i> LADF-1        | <i>E. coli</i> BL21 (DE3) harboring pETDuet-1- <i>hemL-hemA</i> <sup>s</sup> and pRSFDuet-1- <i>hemD-hemF</i>                                                            | This study |
| <i>E. coli</i> LADF-2        | <i>E. coli</i> BL21 (DE3) harboring pETDuet-1- <i>hemL-hemA</i> <sup>s</sup> - <i>hemD</i> and pRSFDuet-1- <i>hemF</i>                                                   | This study |
| <i>E. coli</i> LADF-3        | <i>E. coli</i> BL21 (DE3) harboring pETDuet-1- <i>hemL-hemA</i> <sup>s</sup> - <i>hemF</i> and pRSFDuet-1- <i>hemD</i>                                                   | This study |
| <i>E. coli</i> LADF-4        | <i>E. coli</i> BL21 (DE3) harboring pRSFDuet-1- <i>hemL-hemA</i> <sup>s</sup> and pETDuet-1- <i>hemD-hemF</i>                                                            | This study |
| <i>E. coli</i> LADF-5        | <i>E. coli</i> BL21 (DE3) harboring pRSFDuet-1- <i>hemL-hemA</i> <sup>s</sup> - <i>hemD</i> and pETDuet-1- <i>hemF</i>                                                   | This study |
| <i>E. coli</i> LADF-6        | <i>E. coli</i> BL21 (DE3) harboring pRSFDuet-1- <i>hemL-hemA</i> <sup>s</sup> - <i>hemF</i> and pETDuet-1- <i>hemD</i>                                                   | This study |
| <i>E. coli</i> LADFX         | <i>E. coli</i> BL21 (DE3) harboring pRSFDuet-1- <i>hemL-hemA</i> <sup>s</sup> - <i>hemF</i> and pETDuet-1- <i>hemD-gltX</i>                                              | This study |

**Supplementary Table S2.** Plasmids used in this study.

| Plasmids                                       | Relevant genotypes                                                           | References |
|------------------------------------------------|------------------------------------------------------------------------------|------------|
| pMD19 (Simple)                                 | Cloning vector, Amp <sup>R</sup>                                             | Takara     |
| pACYCDuet-1                                    | Double T7 promoters, P15A ori, Cm <sup>R</sup>                               | Novagen    |
| pCDFDuet-1                                     | Double T7 promoters, CDF13 ori, Sm <sup>R</sup>                              | Novagen    |
| pETDuet-1                                      | Double T7 promoters, pBR322 ori, Amp <sup>R</sup>                            | Novagen    |
| pRSFDuet-1                                     | Double T7 promoters, RSF ori, Kan <sup>R</sup>                               | Novagen    |
| pCDFDuet-1- <i>hemB</i>                        | pCDFDuet-1 containing <i>hemB</i>                                            | This study |
| pCDFDuet-1- <i>hemC</i>                        | pCDFDuet-1 containing <i>hemC</i>                                            | This study |
| pCDFDuet-1- <i>hemD</i>                        | pCDFDuet-1 containing <i>hemD</i>                                            | This study |
| pCDFDuet-1- <i>hemE</i>                        | pCDFDuet-1 containing <i>hemE</i>                                            | This study |
| pCDFDuet-1- <i>hemF</i>                        | pCDFDuet-1 containing <i>hemF</i>                                            | This study |
| pCDFDuet-1- <i>hemG</i>                        | pCDFDuet-1 containing <i>hemG</i>                                            | This study |
| pCDFDuet-1- <i>hemH</i>                        | pCDFDuet-1 containing <i>hemH</i>                                            | This study |
| pACYCDuet-1- <i>hemL-hemA<sup>s</sup></i>      | pACYCDuet-1 containing <i>hemL</i> and <i>hemA<sup>s</sup></i>               | This study |
| pACYCDuet-1- <i>hemL-hemA<sup>s</sup>-hemF</i> | pACYCDuet-1 containing <i>hemL</i> , <i>hemA<sup>s</sup></i> and <i>hemF</i> | This study |
| pETDuet-1- <i>hemL-hemA<sup>s</sup></i>        | pETDuet-1 containing <i>hemL</i> and <i>hemA<sup>s</sup></i>                 | This study |
| pETDuet-1- <i>hemD</i>                         | pETDuet-1 containing <i>hemD</i>                                             | This study |
| pETDuet-1- <i>hemF</i>                         | pETDuet-1 containing <i>hemF</i>                                             | This study |
| pETDuet-1- <i>hemL-hemA<sup>s</sup>-hemD</i>   | pETDuet-1 containing <i>hemL</i> , <i>hemA<sup>s</sup></i> and <i>hemD</i>   | This study |
| pETDuet-1- <i>hemL-hemA<sup>s</sup>-hemF</i>   | pETDuet-1 containing <i>hemL</i> , <i>hemA<sup>s</sup></i> and <i>hemF</i>   | This study |
| pETDuet-1- <i>hemD-hemF</i>                    | pETDuet-1 containing <i>hemD</i> and <i>hemA<sup>s</sup></i>                 | This study |
| pRSFDuet-1- <i>hemL-hemA<sup>s</sup></i>       | pRSFDuet-1 containing <i>hemL</i> and <i>hemA<sup>s</sup></i>                | This study |
| pRSFDuet-1- <i>hemD</i>                        | pRSFDuet-1 containing <i>hemD</i>                                            | This study |
| pRSFDuet-1- <i>hemF</i>                        | pRSFDuet-1 containing <i>hemF</i>                                            | This study |
| pRSFDuet-1- <i>hemL-hemA<sup>s</sup>-hemD</i>  | pRSFDuet-1 containing <i>hemL</i> , <i>hemA<sup>s</sup></i> and <i>hemD</i>  | This study |
| pRSFDuet-1- <i>hemL-hemA<sup>s</sup>-hemF</i>  | pRSFDuet-1 containing <i>hemL</i> , <i>hemA<sup>s</sup></i> and <i>hemF</i>  | This study |
| pRSFDuet-1- <i>hemD-hemF</i>                   | pRSFDuet-1 containing <i>hemD</i> and <i>hemF</i>                            | This study |
| pETDuet-1- <i>hemD-gltX</i>                    | pETDuet-1 containing <i>hemD</i> and <i>gltX</i>                             | This study |

**Supplementary Table S3.** Primers used for genetic manipulation in this study.

| Primers                        | Sequence (5'-3')*                                 |
|--------------------------------|---------------------------------------------------|
| <i>hemL-hemA<sup>s</sup>-F</i> | CGCGGATCCATAAAAAGGAGGAAAATATATGAGTAAGTCTGAA       |
| <i>hemL-hemA<sup>s</sup>-R</i> | TGCACTGCAGTTACTCCAGCCCGAGGCTG                     |
| <i>hemB-F</i>                  | CGCCATATGACAGACTTAATCCAACGCCC                     |
| <i>hemB-R</i>                  | CCGCTCGAGTTAACGCAGAATCTTCTTCAGC                   |
| <i>hemC-F</i>                  | CGCCATATGTTAGACAATGTTTTAAGAATTGCC                 |
| <i>hemC-R</i>                  | CCGCTCGAGTTATGCCGGGGCGTCT                         |
| <i>hemD-F</i>                  | CGCCATATGAGTATCCTTGTACCCGCC                       |
| <i>hemD-R</i>                  | CCGCTCGAGTTATTGTAATGCCCGTAAAAGCG                  |
| <i>hemE-F</i>                  | CGCCATATGACCGAACTTAAAAACGATCGT                    |
| <i>hemE-R</i>                  | CCGCTCGAGTTAGCGGTGATACTGTTTCAGACAGTC              |
| <i>hemF-F</i>                  | CGCCATATGAAAACCCGACGCACACC                        |
| <i>hemF-R</i>                  | CCGCTCGAGTTACACCCAATCCCTGACCTTAAT                 |
| <i>hemG-F</i>                  | CGCCATATGAAAACATTAATTCTTTCTCAACA                  |
| <i>hemG-R</i>                  | CCGCTCGAGTTATTTTCAGCGTCGGTTTGTC                   |
| <i>hemH-F</i>                  | CGCCATATGCGTCAGACTAAAACCGGTATC                    |
| <i>hemH-R</i>                  | CCGCTCGAGTTAGCGATACGCGGCAACA                      |
| <i>hemD (2)-F</i>              | CGCGGATCCATAAAAAGGAGGAAAATATATGAGTATCCTTGTACCCGCC |
| <i>hemD (2)-R</i>              | TGCACTGCAGTTATTGTAATGCCCGTAAAAGCG                 |
| <i>gltX-F</i>                  | CGCCATATGAAAATCAAACCTCGCTTCG                      |
| <i>gltX-R</i>                  | CCGCTCGAGTTACTGCTGATTTTCGCGTTC                    |
| Primers for qRT-PCR            |                                                   |
| <i>gapA (RT)-F</i>             | GTTACAGCTACTACCGCTAC                              |
| <i>gapA (RT)-R</i>             | CATACCAGTCAGTTTGCCATTC                            |
| <i>gltX (RT)-F</i>             | TGAAAGAGATGGCACAGAGC                              |
| <i>gltX (RT)-R</i>             | GCGGTCCAGTCAGTAATCG                               |
| <i>hemA (RT)-F</i>             | CCAGGCAGAGCAAGTTCG                                |
| <i>hemA (RT)-R</i>             | ATTCAGGCGTTCGTTATCCC                              |
| <i>hemL (RT)-F</i>             | TGGTCGTCGTGATGTAATGG                              |
| <i>hemL (RT)-R</i>             | GCTTCTTCTGCCGCTTCC                                |
| <i>hemB (RT)-F</i>             | GAGACAACACTTAGCCTTAACG                            |
| <i>hemB (RT)-R</i>             | AGTCATCACGGAACGAATACC                             |
| <i>hemD (RT)-F</i>             | TATCGTGAGCACTGGTTACTAC                            |
| <i>hemD (RT)-R</i>             | CATCGTTGTCAGCGTTATCG                              |
| <i>hemF (RT)-F</i>             | ATGAAACCCGACGCACAC                                |
| <i>hemF (RT)-R</i>             | ACCACCATTACGCAACACC                               |
| <i>hemG (RT)-F</i>             | AACAAGGGACGGACAAACG                               |
| <i>hemG (RT)-R</i>             | GCGAATAGAAGCACCAATGAC                             |
| <i>hemH (RT)-F</i>             | ACGCCGATAACCACGATTAC                              |
| <i>hemH (RT)-R</i>             | GGAAGCCAGTTCACGAGTC                               |

\*Restriction sites used for cloning are underlined, and ribosome binding sites are in bold.

## Supplementary Methods

### DNA manipulations

The oligonucleotides synthesized by Sangon Biotech (Shanghai, China) and used for PCR amplification are listed in Supplementary Table S3. Genomic DNA of *E. coli* DH5 $\alpha$  was used as a template for gene amplification. The PCR products purified with DNA Gel Extraction Kit (Thermo Fisher Scientific, America) were subcloned into a T-vector (pMD19, Takara, Dalian, China), and sequenced for verification (Sangon Biotech, Shanghai, China). Then the recombinant vectors were transformed into *E. coli* JM109 for the DNA manipulations and *E. coli* BL21 (DE3) for ALA production.

All plasmids constructed in this study are listed in Supplementary Table S2. Modular system was designed for investigation of regulatory mechanism and ALA production in *E. coli*. This system is based on four compatible plasmids belonging to different incompatibility groups, pACYCDuet-1, pCDFDuet-1, pETDuet-1, and pRSFDuet-1. Given that HemA and HemL are rate-limiting enzymes in the C5 pathway for ALA biosynthesis<sup>17</sup>, a mutant *hemA* (named *hemA<sup>s</sup>*) and *hemL* were amplified together and inserted into the pACYCDuet-1 vector using *Bam*HI and *Pst*I restriction sites, yielding the recombinant plasmid pACYCDuet-1-*hemL-hemA<sup>s</sup>*. As pACYCDuet-1 contains an *Nco*I restriction sites, a base A and termination codon (TAA) was added after *Bam*HI site to avoid the frameshift mutation. And in order to enhance the translation efficiency, a sequence of ribosome binding site was added before the initial codon (ATG). Meanwhile, *hemB*, *hemC*, *hemD*, *hemE*, *hemF*, *hemG* and *hemH* were amplified using genomic

DNA of *E. coli* DH5 $\alpha$  as template and inserted pCDFDuet-1 vector using *Nde*I and *Xho*I restriction sites, respectively. In addition, *hemF* was digested with *Nde*I and *Xho*I restriction enzymes and connected with pACYCDuet-1-*hemL-hemA*<sup>s</sup>, which was cut with the same restriction enzymes, yielding the recombinant plasmid pACYCDuet-1-*hemL-hemA*<sup>s</sup>-*hemF*. Each gene was placed under control of an induced T7 promoter.

Furthermore, pETDuet-1 and pRSFDuet-1 as a medium and a high copy number plasmids were used to assemble and optimize the expression of *hemA*<sup>s</sup>, *hemL*, *hemD* and *hemF*. Similar to the above, plasmids pETDuet-1-*hemL-hemA*<sup>s</sup>, pRSFDuet-1-*hemD-hemF*, pETDuet-1-*hemL-hemA*<sup>s</sup>-*hemD*, pRSFDuet-1-*hemF*, pETDuet-1-*hemL-hemA*<sup>s</sup>-*hemF*, pRSFDuet-1-*hemD*, pRSFDuet-1-*hemL-hemA*<sup>s</sup>, pETDuet-1-*hemD-hemF*, pRSFDuet-1-*hemL-hemA*<sup>s</sup>-*hemD*, pETDuet-1-*hemF*, pRSFDuet-1-*hemL-hemA*<sup>s</sup>-*hemF* and pETDuet-1-*hemD* were constructed with the same restriction enzymes sites. Among them, *hemD* gene in pRSFDuet-1-*hemD-hemF* and pETDuet-1-*hemD-hemF* was amplified with the primers *hemD* (2)-F and *hemD* (2)-R. In addition, *gltX* was amplified using genomic DNA of *E. coli* DH5 $\alpha$  as template and inserted to plasmid pETDuet-1-*hemD* with restriction sites *Nde*I and *Xho*I, yielding the plasmid pETDuet-1-*hemD-gltX*.
